# Supplementary material for: Antibiotic use in a tertiary healthcare facility in Ghana: a point prevalence survey
Source: Springer Nature journal article supplement (doi:10.1186/s13756-018-0299-z), 2018-01-26

## Project: Antibiotic use in Korle-Bu Teaching Hospital

### Antibiotic use survey instrument

Date of survey:

Date of admission

Survey no:

Department/Unit:

Mode of payment: A.NHIS  B. Self-funded  C. Private insurance

Age:

Sex: M  F

Duration of admission:

| <i>Drug</i> | <i>Date started</i> | <i>Date stopped</i> | <i>Unit dose<sup>1</sup></i> | <i>Doses per day<sup>2</sup></i> | <i>Route<sup>3</sup></i> | <i>Diagnosis<sup>4</sup></i> | <i>Indication<sup>5</sup></i> | <i>Immuno-suppression<sup>6</sup></i> | <i>Foreign material<sup>7</sup></i> | <i>Culture pre-therapy<sup>8</sup></i> | <i>Reason in notes<sup>9</sup></i> | <i>Assessment<sup>10</sup></i> | <i>Missed doses in admission<sup>11</sup></i> |
|-------------|---------------------|---------------------|------------------------------|----------------------------------|--------------------------|------------------------------|-------------------------------|---------------------------------------|-------------------------------------|----------------------------------------|------------------------------------|--------------------------------|-----------------------------------------------|
|             |                     |                     |                              |                                  |                          |                              |                               |                                       |                                     |                                        |                                    |                                |                                               |
|             |                     |                     |                              |                                  |                          |                              |                               |                                       |                                     |                                        |                                    |                                |                                               |
|             |                     |                     |                              |                                  |                          |                              |                               |                                       |                                     |                                        |                                    |                                |                                               |
|             |                     |                     |                              |                                  |                          |                              |                               |                                       |                                     |                                        |                                    |                                |                                               |
|             |                     |                     |                              |                                  |                          |                              |                               |                                       |                                     |                                        |                                    |                                |                                               |
|             |                     |                     |                              |                                  |                          |                              |                               |                                       |                                     |                                        |                                    |                                |                                               |
|             |                     |                     |                              |                                  |                          |                              |                               |                                       |                                     |                                        |                                    |                                |                                               |

Survey instrument adapted with minor modifications from the European Surveillance of Antimicrobial Consumption (ESAC) Point-Prevalence Survey of Antibacterial Use in 20 European Hospitals

Project Lead: Dr Appiah-Korang Labi

Contact: Department of Medical Microbiolog: Phone, 0244863056

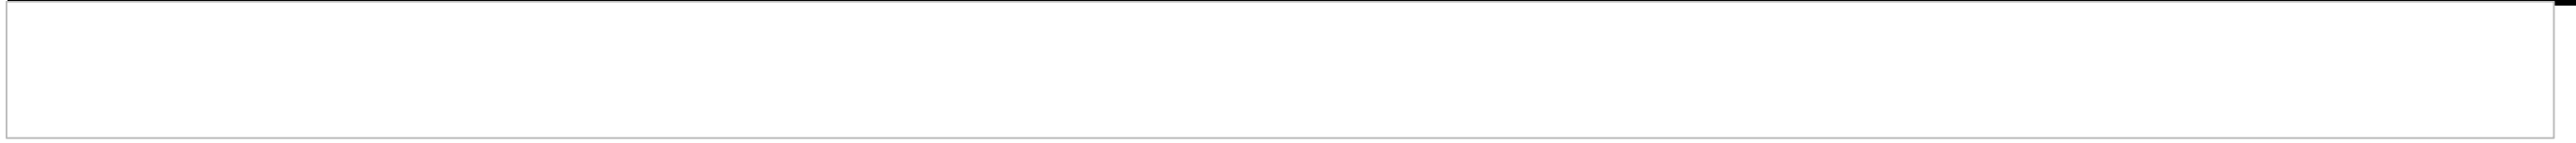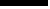

Supplement: MOESM1 [file 15418440]
